# Supplementary material for: The Cell Wall Deacetylases Spy1094 and Spy1370 Contribute to Streptococcus pyogenes Virulence
Source: MDPI journal article supplement (doi:10.3390/microorganisms11020305), 2023-01-24
Supplement: s1 [file s1]

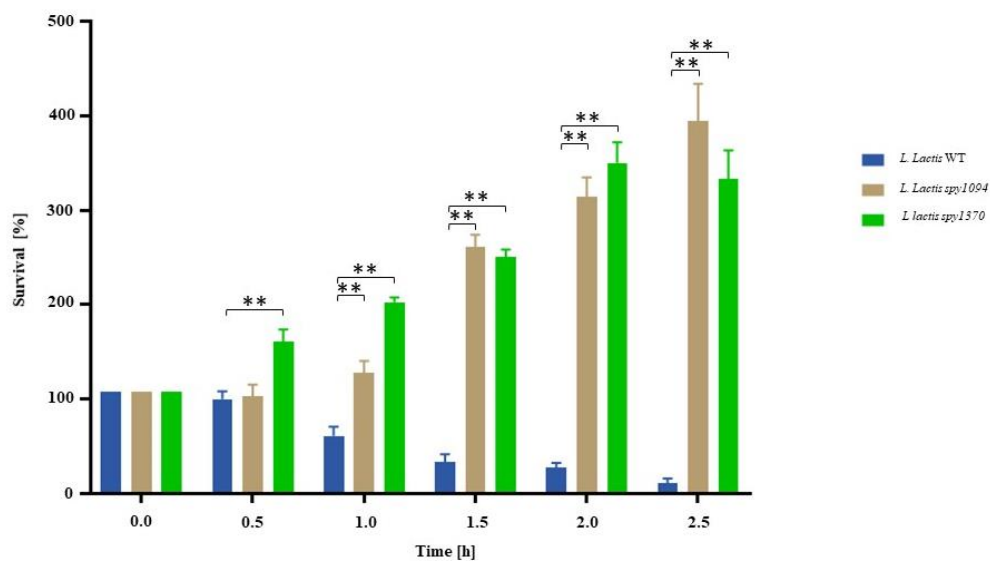

### Supplementary Figure S1. Survival of wildtype and mutant *L. Lactis* strains in whole human blood

Freshly collected human blood was inoculated with  $1 \times 10^3$  CFU per ml with *L. lactis* and mutant strains. Surviving bacteria were enumerated by spot-plating in triplicates on GM17 agar plates. Data are mean values  $\pm$  SD. *P* values were calculated using the one-way ANOVA tests. \*\**P* < 0.001.
